# Supplementary material for: Computational study on the mechanisms and kinetics of the CH2BrO2 + ClO reaction in the atmosphere
Source: Royal Society of Chemistry journal article supplement (doi:10.1039/c9ra10511e), 2020-01-01
Supplement: c9ra10511e1.pdf [file c9ra10511e1.pdf]

# **Computational Study on the Mechanisms and Kinetics of the CH<sub>2</sub>BrO<sub>2</sub> + ClO Reaction in the Atmosphere**

Yunju Zhang,<sup>1\*</sup> Yizhen Tang,<sup>2</sup> Bing He,<sup>3</sup>

*<sup>1</sup>Key Laboratory of Photoinduced Functional Materials, Mianyang Normal University,*

*Mianyang 621000, PR China*

*<sup>2</sup>School of Environmental and municipal engineering, Qingdao University of*

*Technology, Fushun Road 11. Qingdao, Shandong, 266033 P.R. China.*

*<sup>3</sup>College of Chemistry and Life Science, Institute of functional molecules, Chengdu*

*Normal University, Chengdu, Sichuan 611130, PR China*

**Table S1.** The Zero-point energy correction (ZPE), relative energies ( $\Delta E$ ), reactions enthalpies ( $\Delta H$ ) and reaction Gibbs free energies ( $\Delta G$ ) of all the species for the reaction channels involved in the  $\text{CH}_2\text{BrO}_2$  with  $\text{ClO}$  reaction (energies in kcal/mol).

| Species                                                 | ZPE <sup>a</sup> | $T_1^b$        | $\Delta E^b$ | $\Delta H^b$ | $\Delta G^b$ |
|---------------------------------------------------------|------------------|----------------|--------------|--------------|--------------|
| $\text{CH}_2\text{BrO}_2 + \text{ClO}$                  | 22.3             | 0.021<br>0.034 | 0.0          | 0.0          | 0.0          |
| IM1 ( $\text{CH}_2\text{BrOOCl}$ )                      | 23.9             | 0.016          | -17.1        | -12.0        | -6.4         |
| IM2 ( $\text{CH}_2\text{BrOOCIO}$ )                     | 23.6             | 0.022          | 2.2          | 7.5          | 12.8         |
| IM3 ( $\text{CH}_2\text{BrOCIO}_2$ )                    | 23.9             | 0.022          | -8.0         | -3.0         | 3.0          |
| TS1                                                     | 23.5             | 0.020          | 11.1         | 16.0         | 21.7         |
| TS2                                                     | 21.8             | 0.022          | 18.5         | 23.7         | 28.6         |
| TS3                                                     | 21.2             | 0.024          | -5.0         | -0.1         | 6.2          |
| TS4                                                     | 21.0             | 0.024          | 6.9          | 11.9         | 17.7         |
| TS5                                                     | 21.7             | 0.034          | 12.1         | 17.1         | 23.1         |
| TS6                                                     | 21.3             | 0.057          | 52.6         | 58.1         | 63.3         |
| TS7                                                     | 21.8             | 0.037          | 56.6         | 62.1         | 66.7         |
| TS8                                                     | 21.9             | 0.030          | 19.8         | 25.1         | 30.6         |
| TS9                                                     | 21.7             | 0.036          | 17.4         | 22.7         | 28.4         |
| TS10                                                    | 22.0             | 0.031          | 47.8         | 53.1         | 58.1         |
| TS11                                                    | 21.9             | 0.022          | -0.8         | 3.9          | 10.8         |
| TS12                                                    | 22.7             | 0.024          | 15.8         | 21.0         | 26.5         |
| TS13                                                    | 21.6             | 0.083          | 61.5         | 67.0         | 71.7         |
| TS14                                                    | 20.7             | 0.048          | 58.1         | 64.1         | 67.8         |
| T-TS1                                                   | 19.4             | 0.027          | 28.0         | 34.6         | 34.3         |
| T-TS2                                                   | 21.0             | 0.046          | 45.0         | 50.6         | 53.5         |
| T-TS3                                                   | 20.9             | 0.036          | 26.4         | 32.4         | 34.8         |
| T-TS4                                                   | 21.4             | 0.142          | 72.0         | 77.7         | 80.8         |
| T-h-TS1                                                 | 18.8             | 0.023          | 13.9         | 19.3         | 23.2         |
| P1 ( $\text{CHBrO} + \text{HO}_2 + \text{Cl}$ )         | 20.4             | 0.014<br>0.028 | -39.5        | -32.9        | -47.5        |
| P2 ( $\text{HOOC} + \text{CHBrO}$ )                     | 22.2             | 0.014<br>0.016 | -66.2        | -60.6        | -66.7        |
| P3 ( $\text{CHBrO}_2 + \text{HOCl}$ )                   | 21.8             | 0.032<br>0.010 | -22.0        | -16.4        | -21.8        |
| P4 ( $\text{CH}_2\text{BrOCl} + \text{O}_2(^1\Delta)$ ) | 22.4             | 0.010<br>0.014 | -15.3        | -9.5         | -13.7        |
| P5 ( $\text{CH}_2\text{BrCl} + \text{O}_3$ )            | 22.5             | 0.008<br>0.026 | -10.5        | -5.1         | -10.7        |
| P6 ( $\text{CH}_2\text{O} + \text{BrClO}_2$ )           | 21.2             | 0.015          | -8.1         | -2.2         | -7.6         |
| P7 ( $\text{CH}_2\text{O} + \text{BrOClO}$ )            | 20.1             | 0.015<br>0.024 | -9.2         | -3.0         | -9.1         |

|                                                                |      |                |       |       |       |
|----------------------------------------------------------------|------|----------------|-------|-------|-------|
| P8 (CHBrO + HOClO)                                             | 21.6 | 0.014<br>0.028 | -52.1 | -46.3 | -52.6 |
| P9 (CH <sub>2</sub> BrClO + O <sub>2</sub> ( <sup>1</sup> Δ))  | 21.4 | 0.016<br>0.014 | 32.7  | 38.7  | 33.9  |
| P10 (CH <sub>2</sub> BrClO + O <sub>2</sub> ( <sup>3</sup> Σ)) | 21.4 | 0.016<br>0.015 | 2.5   | 8.5   | 3.1   |
| P11 (CH <sub>2</sub> BrO + OClO)                               | 20.2 | 0.017<br>0.027 | 8.6   | 14.1  | 7.8   |
| P12 (CH <sub>2</sub> BrOCl + O <sub>2</sub> ( <sup>3</sup> Σ)) | 22.4 | 0.010<br>0.015 | -45.4 | -39.6 | -44.5 |
| P13 (CH <sub>2</sub> BrOOCl + O( <sup>3</sup> P))              | 22.1 | 0.013<br>0.005 | 25.9  | 31.7  | 28.5  |

<sup>a</sup>At the B3LYP/6-311++G(d,p) level

<sup>b</sup>The relative energies are calculated at the CCSD(T)/cc-pVTZ//B3LYP/6-311++G(d,p) + ZPE level

**Table S2.** The Cartesian coordinates of all the species in the CH<sub>2</sub>BrO<sub>2</sub> + ClO reaction.

| Species                          |    | Coordinates(Atom, X, Y, Z) |          |          |
|----------------------------------|----|----------------------------|----------|----------|
| CH <sub>2</sub> BrO <sub>2</sub> | C  | -0.01627                   | 0.77538  | 0.25882  |
|                                  | H  | 0.1943                     | 1.76345  | -0.14101 |
|                                  | H  | -0.23212                   | 0.7703   | 1.32353  |
|                                  | O  | -1.16527                   | 0.30985  | -0.45693 |
|                                  | O  | -1.81031                   | -0.63735 | 0.20177  |
|                                  | Br | 1.5026                     | -0.33774 | -0.06068 |
| ClO                              | O  | -1.84698                   | 0.42469  | 0.68901  |
|                                  | Cl | -2.92846                   | -0.52679 | -0.13943 |
| IM1                              | C  | 0.83834                    | 1.0425   | 0.25915  |
|                                  | H  | 1.37233                    | 1.98289  | 0.14608  |
|                                  | O  | -0.11451                   | 0.97571  | -0.80282 |
|                                  | O  | -1.36647                   | 0.81627  | -0.33662 |
|                                  | O  | -2.14433                   | -0.72009 | -0.30746 |
|                                  | Cl | -3.52247                   | -0.0658  | 0.37933  |
|                                  | H  | 0.33175                    | 0.9482   | 1.21477  |
|                                  | Br | 2.14647                    | -0.3839  | 0.0682   |
| IM2                              | C  | -1.73547                   | 0.85511  | -0.01572 |
|                                  | H  | -2.42771                   | 1.29272  | -0.73136 |
|                                  | O  | -0.46957                   | 1.25278  | -0.45147 |
|                                  | O  | 0.46827                    | 1.03359  | 0.57316  |
|                                  | O  | 2.81847                    | -0.17054 | -0.53037 |
|                                  | Cl | 1.5205                     | -0.49654 | 0.23907  |
|                                  | H  | -1.92022                   | 1.17426  | 1.0071   |
|                                  | Br | -1.99023                   | -1.03732 | -0.05953 |
| IM3                              | C  | 0.62389                    | 1.04187  | 0.27858  |
|                                  | O  | -0.49262                   | 0.40458  | 0.50703  |
|                                  | O  | -2.47376                   | -1.05605 | 0.96138  |
|                                  | O  | -3.51396                   | 0.83795  | -0.34563 |
|                                  | Cl | -2.51394                   | -0.26978 | -0.29294 |
|                                  | H  | 0.62438                    | 1.74025  | -0.56874 |
|                                  | H  | 0.98223                    | 1.55621  | 1.18415  |
|                                  | Br | 2.3116                     | -0.11847 | -0.1491  |
| TS1                              | C  | 2.13649                    | -0.40662 | -0.37339 |
|                                  | H  | 2.9543                     | -1.11362 | -0.23242 |
|                                  | O  | 1.21891                    | -0.6835  | 0.68269  |
|                                  | O  | 0.01533                    | -0.16129 | 0.43102  |
|                                  | O  | -1.88547                   | 1.10588  | 0.28867  |
|                                  | Cl | -2.10069                   | -0.34364 | -0.30768 |
|                                  | H  | 1.62102                    | -0.49959 | -1.32953 |
|                                  | Br | 2.80397                    | 1.37364  | -0.19106 |

|     |    |          |          |          |
|-----|----|----------|----------|----------|
| TS2 | C  | 1.56494  | 0.75389  | 0.45046  |
|     | O  | 0.36207  | 0.32603  | 0.19761  |
|     | O  | -1.31038 | -0.98335 | 0.7842   |
|     | O  | -2.84956 | 0.88299  | -0.09546 |
|     | Cl | -1.94515 | -0.28346 | -0.38564 |
|     | H  | 1.74037  | 1.77493  | 0.0634   |
|     | H  | 1.7915   | 0.76347  | 1.53101  |
|     | Br | 2.9723   | -0.23813 | -0.28425 |
| TS3 | C  | -0.99427 | -0.11405 | 0.69549  |
|     | H  | -0.84943 | -0.89667 | 1.45582  |
|     | O  | -0.75086 | 1.07876  | 0.96047  |
|     | O  | 0.73157  | 1.45769  | -0.47854 |
|     | O  | 0.9357   | 0.31199  | -0.82665 |
|     | Cl | 2.44754  | -0.68467 | 0.15904  |
|     | H  | -0.10042 | -0.41801 | -0.10717 |
|     | Br | -2.5254  | -0.55352 | -0.35837 |
| TS4 | C  | 1.63198  | 0.68574  | 0.41725  |
|     | O  | 1.05275  | 1.27392  | -0.53501 |
|     | O  | -0.53007 | -0.05993 | -0.08281 |
|     | O  | -1.53303 | -0.68723 | -0.43542 |
|     | Cl | -3.21068 | 0.00404  | 0.18708  |
|     | H  | 2.00223  | 1.28922  | 1.26276  |
|     | H  | 0.81078  | -0.01706 | 0.91129  |
|     | Br | 2.98295  | -0.60536 | 0.02223  |
| TS5 | C  | -1.24355 | 0.21513  | 0.75549  |
|     | H  | -1.98409 | 0.28212  | 1.54677  |
|     | O  | -1.29391 | 1.39643  | 0.02567  |
|     | O  | -0.43624 | 1.41762  | -0.94606 |
|     | O  | 1.3352   | 0.62659  | 0.75397  |
|     | Cl | 2.17912  | -0.44079 | -0.17248 |
|     | H  | -0.12166 | 0.22795  | 1.07566  |
|     | Br | -1.44506 | -1.40107 | -0.24222 |
| TS6 | C  | -1.00306 | -0.78922 | 0.80367  |
|     | H  | -0.93493 | -0.29544 | 1.75879  |
|     | O  | 0.13144  | 1.53443  | 0.71103  |
|     | O  | 0.13743  | 1.39929  | -0.51828 |
|     | O  | 0.75481  | -0.30198 | -0.78513 |
|     | Cl | 2.18096  | -0.52123 | 0.07929  |
|     | H  | -0.49953 | -1.71599 | 0.58548  |
|     | Br | -2.40623 | -0.25051 | -0.37488 |

|      |    |          |          |          |
|------|----|----------|----------|----------|
| TS7  | C  | 1.14778  | -0.11837 | 0.91344  |
|      | H  | 0.9795   | -1.06338 | 1.40035  |
|      | O  | -0.50387 | -1.6927  | 0.10361  |
|      | O  | -1.56831 | -1.17889 | -0.47903 |
|      | O  | -2.13596 | -0.26693 | 0.18958  |
|      | Cl | -0.79754 | 1.61519  | -0.07831 |
|      | H  | 0.8989   | 0.81801  | 1.38302  |
|      | Br | 2.42777  | -0.07664 | -0.50359 |
| TS8  | C  | -1.76894 | 1.10717  | -0.13198 |
|      | H  | -2.5173  | 1.01784  | -0.93212 |
|      | O  | -0.6784  | 1.61372  | -0.43829 |
|      | O  | 0.81345  | 0.86346  | 0.90245  |
|      | O  | 2.42992  | -0.21579 | -0.76043 |
|      | Cl | 1.29065  | -0.3849  | 0.19996  |
|      | H  | -2.14959 | 1.12493  | 0.8947   |
|      | Br | -1.59884 | -1.1961  | -0.01176 |
| TS9  | C  | -1.67681 | 0.99874  | 0.29243  |
|      | O  | -0.91054 | 1.70866  | -0.36481 |
|      | O  | 1.09674  | 1.23977  | 0.38684  |
|      | O  | 1.19792  | -1.34204 | 0.36425  |
|      | Cl | 1.64552  | -0.03357 | -0.2583  |
|      | H  | -1.57777 | 0.891    | 1.37824  |
|      | H  | -2.69729 | 0.83097  | -0.11051 |
|      | Br | -1.45359 | -1.17617 | -0.10126 |
| TS10 | C  | -0.98854 | -0.22582 | 0.78155  |
|      | H  | -0.8717  | 0.62125  | 1.44331  |
|      | O  | 0.05162  | 1.2251   | -0.43509 |
|      | O  | 0.94957  | 1.79668  | 0.18105  |
|      | O  | 0.5988   | -0.76551 | -0.58391 |
|      | Cl | 2.10704  | -0.66381 | 0.08958  |
|      | H  | -0.6465  | -1.1913  | 1.11609  |
|      | Br | -2.60347 | -0.2922  | -0.23615 |
| TS11 | C  | 1.0427   | -0.48462 | 0.60412  |
|      | O  | 0.23538  | -1.15329 | -0.13329 |
|      | O  | -2.6156  | -0.57489 | 0.21691  |
|      | O  | -0.85144 | 1.27389  | 0.4654   |
|      | Cl | -1.5139  | 0.21683  | -0.41158 |
|      | H  | 0.48514  | 0.49607  | 0.94247  |
|      | H  | 1.35924  | -0.96217 | 1.54239  |
|      | Br | 2.60889  | 0.21818  | -0.23328 |

|       |    |          |          |          |
|-------|----|----------|----------|----------|
| TS12  | C  | -1.26475 | 1.43075  | -0.26618 |
|       | O  | -0.06918 | 1.52994  | 0.1031   |
|       | O  | 2.28227  | 0.123    | 0.8043   |
|       | O  | 0.45658  | -1.29374 | -0.27855 |
|       | Cl | 1.42635  | -0.16535 | -0.37359 |
|       | H  | -1.52715 | 1.28215  | -1.31797 |
|       | H  | -2.01866 | 1.91726  | 0.35952  |
|       | Br | -2.0277  | -0.69686 | 0.22798  |
| TS13  | C  | 0.64167  | -0.16652 | 0.10755  |
|       | H  | 0.36299  | -0.72472 | -0.78122 |
|       | O  | 2.33869  | -0.24671 | -0.48719 |
|       | O  | 3.05143  | -1.06039 | 0.11781  |
|       | O  | -1.22687 | -0.97419 | 0.46809  |
|       | Cl | -2.59172 | -0.31065 | -0.20888 |
|       | H  | 0.83443  | -0.64117 | 1.05759  |
|       | Br | 0.3013   | 1.71291  | 0.10828  |
| TS14  | C  | 0.5662   | -0.5904  | 0.10439  |
|       | H  | 0.49049  | -1.21347 | -0.77081 |
|       | O  | 2.76548  | -0.16229 | -0.51004 |
|       | O  | 3.55013  | -0.44362 | 0.38524  |
|       | Cl | -2.37385 | -0.78539 | -0.04253 |
|       | O  | -2.2514  | 0.85045  | 0.11828  |
|       | H  | 0.76818  | -1.05627 | 1.04623  |
|       | Br | 0.12786  | 1.26411  | -0.02502 |
| T-TS1 | C  | -0.21334 | 0.59167  | 0.04853  |
|       | O  | -2.36056 | 1.92211  | 0.04306  |
|       | O  | -3.34371 | 1.21778  | -0.04144 |
|       | O  | 3.9344   | 1.0899   | -0.14334 |
|       | Cl | 2.76432  | -0.00397 | 0.07976  |
|       | H  | -0.03513 | 1.02365  | 1.02051  |
|       | H  | 0.02167  | 1.0763   | -0.88428 |
|       | Br | -0.90117 | -1.12631 | -0.01856 |
| T-TS2 | C  | -2.23392 | -0.16927 | 0.51816  |
|       | H  | -1.78363 | 0.29263  | 1.40315  |
|       | O  | -1.35354 | -0.91036 | -0.19047 |
|       | O  | 0.06925  | 0.09319  | -0.34695 |
|       | O  | 3.00636  | 0.63845  | 0.23657  |
|       | Cl | 1.7511   | -0.27257 | -0.04967 |
|       | H  | -3.03839 | -0.86603 | 0.80356  |
|       | Br | -3.02966 | 1.231    | -0.50855 |

|                       |    |          |          |          |
|-----------------------|----|----------|----------|----------|
| T-TS3                 | C  | 0.59519  | -0.51215 | -0.00001 |
|                       | O  | 2.5181   | -0.96598 | -0.00005 |
|                       | O  | 3.27774  | 0.00742  | 0.00007  |
|                       | O  | -1.6531  | -1.11364 | -0.00001 |
|                       | Cl | -2.77736 | 0.08877  | 0.00002  |
|                       | H  | 0.43185  | -1.00447 | 0.94363  |
|                       | H  | 0.43179  | -1.00451 | -0.94359 |
|                       | Br | 0.56344  | 1.39759  | -0.00003 |
| T-TS4                 | C  | -1.5194  | -0.58413 | 0.44098  |
|                       | H  | -2.48328 | -0.10933 | 0.63022  |
|                       | O  | -0.57238 | 0.4243   | 0.3636   |
|                       | O  | -1.41535 | 1.96213  | -0.24983 |
|                       | O  | 0.92085  | -0.40746 | 0.77664  |
|                       | Cl | 2.10374  | 0.03956  | -0.29195 |
|                       | H  | -1.23661 | -1.27766 | 1.23624  |
|                       | Br | -1.6298  | -1.56184 | -1.19609 |
| T-h-TS1               | C  | 0.99567  | -0.0072  | 0.74159  |
|                       | H  | 1.22689  | 0.11646  | 1.79753  |
|                       | O  | 1.82878  | -1.02618 | 0.23452  |
|                       | O  | 1.40919  | -1.52083 | -0.92696 |
|                       | O  | -1.40266 | -0.80563 | 0.77068  |
|                       | Cl | -2.3395  | 0.1072   | -0.29936 |
|                       | H  | -0.30601 | -0.44015 | 0.70168  |
|                       | Br | 1.07734  | 1.63477  | -0.2307  |
| CH <sub>2</sub> BrOCl | C  | -0.50596 | 0.59021  | 1.04727  |
|                       | H  | -0.95149 | 1.58079  | 1.09525  |
|                       | O  | 0.7824   | 0.80678  | 0.59066  |
|                       | O  | 1.56919  | -0.37776 | 0.94224  |
|                       | Cl | 2.63985  | -0.71799 | -0.35865 |
|                       | H  | -0.51965 | 0.07399  | 2.0044   |
|                       | Br | -1.66714 | -0.47636 | -0.16892 |
| CH <sub>2</sub> BrOCl | C  | -0.75923 | -0.00001 | 0.       |
|                       | H  | -1.3027  | -0.25564 | 0.80264  |
|                       | O  | 0.53884  | -1.2399  | 0.       |
|                       | Cl | -0.00137 | -2.8608  | 0.       |
|                       | H  | -1.3027  | -0.25564 | -0.80264 |
|                       | Br | 0.08042  | 1.6849   | 0.       |
| CH <sub>2</sub> BrClO | C  | -0.04539 | 0.84321  | 0.       |
|                       | O  | -3.25168 | 0.2962   | 0.       |
|                       | Cl | -1.81555 | -0.42965 | 0.       |
|                       | H  | -0.19626 | 1.38998  | -0.92256 |
|                       | H  | -0.19626 | 1.38998  | 0.92256  |
|                       | Br | 1.64397  | -0.08315 | 0.       |

|                      |    |          |          |          |
|----------------------|----|----------|----------|----------|
| CH <sub>2</sub> BrCl | C  | -0.88827 | 0.47798  | 0.       |
|                      | H  | -1.42504 | 0.69939  | -0.90402 |
|                      | Cl | 0.25368  | 1.98395  | 0.       |
|                      | H  | -1.42504 | 0.69939  | 0.90402  |
|                      | Br | 0.106    | -1.08757 | 0.       |
| BrOClO               | O  | 2.18459  | 0.90775  | 0.47736  |
|                      | O  | 0.79317  | -1.30083 | 0.32372  |
|                      | Cl | 1.97684  | -0.41233 | -0.24417 |
|                      | Br | -1.38276 | -0.60339 | -0.03688 |
| CH <sub>2</sub> BrO  | C  | -0.49356 | 1.20166  | 0.       |
|                      | H  | -1.12412 | 1.29146  | -0.89865 |
|                      | O  | 0.45858  | 2.08883  | 0.       |
|                      | H  | -1.12412 | 1.29146  | 0.89865  |
|                      | Br | 0.04435  | -0.75751 | 0.       |
| HOClO                | O  | -2.65351 | -0.61971 | 0.2854   |
|                      | O  | -0.78711 | 1.40305  | 0.56891  |
|                      | Cl | -1.6476  | 0.26438  | -0.47992 |
|                      | H  | -0.34526 | 0.8452   | 1.22632  |
| CHBrO <sub>2</sub>   | C  | -0.86083 | 1.06189  | 0.73505  |
|                      | H  | -1.21827 | 1.26838  | 1.72222  |
|                      | O  | -0.14811 | 1.90728  | 0.13429  |
|                      | O  | 0.29284  | 1.65255  | -1.08352 |
|                      | Br | -1.30456 | -0.58982 | -0.11525 |
| CHBrO                | C  | -0.43593 | 1.2302   | 0.       |
|                      | O  | 0.36762  | 2.08473  | 0.       |
|                      | H  | -1.52898 | 1.33441  | 0.       |
|                      | Br | 0.03439  | -0.72553 | 0.       |
| HOCl                 | O  | -1.7909  | -0.16184 | 0.17055  |
|                      | O  | -2.94944 | 0.20414  | 0.84356  |
|                      | Cl | -4.32062 | 0.13275  | -0.27935 |
|                      | H  | -1.49756 | 0.6851   | -0.21538 |
| CHBrO                | C  | -0.4425  | -1.2284  | 0.       |
|                      | O  | 0.37295  | -2.07133 | 0.       |
|                      | H  | -1.52947 | -1.34106 | 0.       |
|                      | Br | 0.03431  | 0.72234  | 0.       |
| BrClO <sub>2</sub>   | O  | 1.38624  | 0.74376  | 1.03702  |
|                      | O  | 2.25609  | -0.64306 | -0.88041 |
|                      | Cl | 1.29638  | -0.52204 | 0.25803  |
|                      | Br | -1.17772 | -0.64921 | 0.00754  |
| CH <sub>2</sub> O    | C  | 0.       | 0.       | -0.53126 |
|                      | H  | 0.94543  | 0.       | -1.10164 |
|                      | O  | 0.       | 0.       | 0.67592  |
|                      | H  | -0.94543 | 0.       | -1.10164 |

|                                  |    |          |          |          |
|----------------------------------|----|----------|----------|----------|
| OCIO                             | O  | -1.68274 | 0.47267  | 0.58164  |
|                                  | O  | -4.08123 | 0.24692  | -0.39703 |
|                                  | Cl | -2.76002 | -0.41583 | -0.02726 |
| HOCl                             | H  | 1.31415  | -0.30068 | 0.93031  |
|                                  | O  | 1.76298  | 0.2081   | 0.23343  |
|                                  | Cl | 3.28586  | -0.45143 | -0.01996 |
| HO <sub>2</sub>                  | O  | 0.243    | 1.58861  | -0.1652  |
|                                  | O  | 0.6068   | 0.53885  | -0.78251 |
|                                  | H  | 0.00183  | -0.22065 | -0.55046 |
| O <sub>2</sub> ( <sup>3</sup> Σ) | O  | -1.64401 | 2.04671  | 0.00049  |
|                                  | O  | -2.59351 | 1.30427  | -0.00047 |
| O <sub>2</sub> ( <sup>1</sup> Δ) | O  | -1.64401 | 2.04671  | 0.00049  |
|                                  | O  | -2.59351 | 1.30427  | -0.00047 |
| O <sub>3</sub>                   | O  | 0.       | -1.07923 | -0.21417 |
|                                  | O  | 0.       | 0.       | 0.4284   |
|                                  | O  | 0.       | 1.07923  | -0.21417 |

**Table S3.** The harmonic vibrational frequencies (imaginary frequency is suffixed with *i*) and the moment of inertia ( $I_a$ ,  $I_b$  and  $I_c$ ) of all the species in the  $\text{CH}_2\text{BrO}_2 + \text{ClO}$  reaction at the B3LYP/6-311++G(d,p) level.

| Species | Frequencies ( $\text{cm}^{-1}$ )                                                                         | $I_a, I_b, I_c$ (amu bohr <sup>2</sup> ) |
|---------|----------------------------------------------------------------------------------------------------------|------------------------------------------|
| IM1     | 29, 85, 123, 263, 298, 452, 511, 591, 601, 656, 885, 935, 1034, 1258, 1295, 1443, 3092, 3174             | 417.94133, 2541.96118, 2795.51661        |
| IM2     | 59, 63, 102, 220, 232, 313, 434, 509, 595, 840, 917, 934, 1023, 1257, 1296, 1449, 3107, 3196             | 488.82053, 2092.47058, 2467.55741        |
| IM3     | 40, 66, 208, 229, 355, 382, 427, 486, 571, 869, 953, 1089, 1105, 1200, 1264, 1432, 2999, 3091            | 325.08365, 2393.24135, 2502.38443        |
| TS1     | 141 <i>i</i> , 32, 92, 106, 219, 303, 493, 524, 611, 846, 893, 964, 1037, 1263, 1298, 1449, 3110, 3203,  | 362.53098, 3200.17764, 3419.15068        |
| TS2     | 140 <i>i</i> , 21, 60, 109, 205, 325, 341, 440, 528, 674, 866, 1043, 1072, 1102, 1258, 1339, 2917, 2953  | 262.44427, 3661.82386, 3737.88436        |
| TS3     | 468, 85, 97, 122, 273, 315, 424, 521, 566, 594, 806, 954, 1140, 1244, 1396, 1444, 1806, 3001             | 498.12133, 2696.46034, 2876.23991        |
| TS4     | 249 <i>i</i> , 50, 95, 124, 241, 292, 399, 519, 563, 572, 708, 969, 1129, 1228, 1292, 1374, 2147, 2982   | 279.73662, 4019.77453, 4202.62594        |
| TS5     | 468 <i>i</i> , 52, 75, 184, 185, 247, 404, 568, 661, 736, 902, 973, 1115, 1193, 1332, 1347, 2032, 3178   | 783.36783, 1641.27083, 2166.48013        |
| TS6     | 378 <i>i</i> , 71, 88, 108, 149, 235, 314, 388, 476, 536, 718, 751, 815, 954, 1337, 1415, 3191, 3347     | 478.43013, 2156.75330, 2370.38280        |
| TS7     | 461 <i>i</i> , 40, 47, 99, 163, 219, 324, 381, 520, 715, 744, 904, 949, 1003, 1139, 1429, 3198, 3349     | 676.97653, 2029.10569, 2522.44289        |
| TS8     | 209 <i>i</i> , 67, 95, 106, 182, 215, 308, 422, 449, 612, 82, 989, 1019, 1153, 1390, 1483, 2974, 3079    | 639.58709, 1796.28437, 2248.64893        |
| TS9     | 228 <i>i</i> , 83, 90, 137, 163, 231, 336, 420, 449, 650, 783, 954, 985, 1133, 1366, 1443, 2901, 3056    | 690.85400, 1505.06242, 2108.78814        |
| TS10    | 517 <i>i</i> , 30, 89, 136, 156, 202, 369, 411, 443, 696, 745, 827, 954, 1077, 1402, 1431, 3154, 3295    | 454.35434, 2348.75974, 2653.67789        |
| TS11    | 309 <i>i</i> , 73, 114, 165, 302, 374, 443, 489, 570, 801, 865, 1036, 1103, 1170, 1271, 1361, 2211, 3009 | 291.40957, 2634.19462, 2779.01083        |
| TS12    | 261 <i>i</i> , 36, 113, 135, 203, 220, 295, 452, 460, 736, 913, 1059, 1100, 1194, 1347, 1504, 3017, 3103 | 492.27827, 1915.38624, 2256.13553        |
| TS13    | 699 <i>i</i> , 58, 84, 92, 161, 199, 213, 306, 452, 680, 737, 901, 1022, 1152, 1327, 1362, 3103, 3279    | 842.86432, 1873.37706, 2625.30290        |
| TS14    | 237 <i>i</i> , 48, 72, 85, 112, 141, 185, 279, 297, 666, 733, 769, 816, 960, 1414, 1427, 3181, 3335      | 560.31698, 2082.33153, 2564.22175        |
| T-TS1   | 163 <i>i</i> , 27, 44, 44, 51, 72, 95, 108, 266, 450, 580, 710, 807, 940, 1392, 1509, 3173, 3333         | 724.37033, 2991.18471, 3702.54658        |
| T-TS2   | 837 <i>i</i> , 29, 44, 65, 96, 215, 289, 320, 466, 572, 783, 827, 1071, 1172, 1243, 1395, 3020, 3106     | 330.56714, 3526.64117, 3760.05338        |
| T-TS3   | 837 <i>i</i> , 29, 44, 65, 96, 215, 289, 320, 466, 572, 783, 827, 1071, 1172, 1243, 1395, 3020, 3106     | 330.56714, 3526.64117, 3760.05338        |

|         |                                                                                                        |                                   |
|---------|--------------------------------------------------------------------------------------------------------|-----------------------------------|
| T-TS4   | 644 <i>i</i> , 19, 60, 87, 121, 231, 311, 353, 360, 591, 755, 876, 990, 1225, 1273, 1417, 3091, 3171   | 740.18184, 2140.79054, 2586.76730 |
| T-h-TS1 | 1601 <i>i</i> , 40, 59, 89, 122, 233, 292, 443, 521, 701, 743, 921, 1015, 1056, 1079, 1292, 1396, 3150 | 915.50259, 1674.59292, 2295.56320 |
